# Supplementary material
Source: MDPI journal article supplement (https://www.mdpi.com/2673-8392/2/1/22)
Supplement: s1 [file s1]

**Table S1 – Risk of bias - CHERRIES Checklist**

| Author                           | Survey Design | IRB approval | Informed consent | Data protection | Development and testing | Closed survey | Contact mode through Internet | Advertising the survey | Web/E-mail | Context | Mandatory/voluntary | Incentives | Time/Date | Randomization of items or questionnaires | Adaptive questioning | Number of Items | Number of screens (pages) | Completeness check | Review step | Unique site visitor | View rate (Ratio of unique survey visitors/unique site visitors) | Participation rate (Ratio of unique visitors who agreed to participate/unique first survey page visitors) | Completion rate (Ratio of users who finished the survey/users who agreed to participate) | Cookies used | IP check | Log file analysis | Registration | Handling of incomplete questionnaires | Questionnaires submitted with an atypical timestamp | Statistical correction | Final Score | Assessment |
|----------------------------------|---------------|--------------|------------------|-----------------|-------------------------|---------------|-------------------------------|------------------------|------------|---------|---------------------|------------|-----------|------------------------------------------|----------------------|-----------------|---------------------------|--------------------|-------------|---------------------|------------------------------------------------------------------|-----------------------------------------------------------------------------------------------------------|------------------------------------------------------------------------------------------|--------------|----------|-------------------|--------------|---------------------------------------|-----------------------------------------------------|------------------------|-------------|------------|
| Cotrin et al. (2020) [21]        | 1             | 1            | 0                | NA              | 0                       | 1             | 1                             | NA                     | 1          | 0       | 1                   | NA         | 0         | NA                                       | NA                   | 0               | 0                         | 0                  | 0           | 0                   | 0                                                                | 0                                                                                                         | 0                                                                                        | 0            | 0        | 0                 | 0            | 0                                     | NA                                                  | 0                      | 25.00       | LOW        |
| Moffat et al. (2020) [22]        | 1             | 1            | 1                | 1               | 1                       | 1             | 1                             | 1                      | 1          | 1       | 1                   | 1          | 1         | NA                                       | NA                   | 0               | 0                         | 0                  | 0           | 0                   | 0                                                                | 0                                                                                                         | 0                                                                                        | 0            | 0        | 0                 | 0            | 0                                     | NA                                                  | 1                      | 51.85       | MODERATE   |
| Peloso et al. (2020) [23]        | 1             | 1            | 0                | NA              | 0                       | 1             | 1                             | NA                     | 1          | 0       | 1                   | NA         | 0         | NA                                       | NA                   | 0               | 0                         | 0                  | 1           | 1                   | 0                                                                | 0                                                                                                         | 0                                                                                        | 0            | 0        | 0                 | 0            | 0                                     | NA                                                  | 0                      | 33.33       | LOW        |
| Gonzales-Olmo et al. (2021) [25] | 1             | 1            | 1                | 0               | 0                       | 1             | 0                             | NA                     | 1          | 1       | 1                   | 0          | 1         | NA                                       | NA                   | 0               | 0                         | 0                  | 0           | 1                   | 0                                                                | 0                                                                                                         | 0                                                                                        | 0            | 0        | 0                 | 0            | 0                                     | NA                                                  | 1                      | 38.46       | MODERATE   |
| Martina et al. (2021) [27]       | 1             | 0            | NA               | NA              | 0                       | 1             | 1                             | NA                     | 1          | 1       | 0                   | NA         | 1         | NA                                       | NA                   | 0               | 0                         | 0                  | 0           | 0                   | 0                                                                | 0                                                                                                         | 0                                                                                        | 0            | 0        | 0                 | 0            | 0                                     | NA                                                  | 1                      | 30.43       | LOW        |
| Nazir et al. (2021) [28]         | 1             | 1            | 1                | 0               | 0                       | 1             | 1                             | NA                     | 1          | 1       | 1                   | NA         | 1         | NA                                       | NA                   | 0               | 0                         | 0                  | 0           | 0                   | 0                                                                | 0                                                                                                         | 0                                                                                        | 0            | 0        | 0                 | 0            | 0                                     | NA                                                  | 1                      | 40.00       | MODERATE   |
| Quan et al. (2021) [29]          | 1             | 1            | 1                | NA              | 0                       | 1             | 1                             | NA                     | 1          | 1       | 1                   | NA         | 1         | NA                                       | NA                   | 0               | 0                         | 0                  | 0           | 0                   | 0                                                                | 0                                                                                                         | 0                                                                                        | 0            | 0        | 0                 | 0            | 0                                     | NA                                                  | 1                      | 41.67       | MODERATE   |
| Umeh et al. (2021) [30]          | 1             | 1            | 0                | 0               | 1                       | 1             | 1                             | 0                      | 1          | 1       | 0                   | NA         | 0         | NA                                       | NA                   | 0               | 0                         | 0                  | 0           | 0                   | 0                                                                | 0                                                                                                         | 0                                                                                        | 0            | 0        | 0                 | 0            | 0                                     | NA                                                  | 0                      | 26.92       | LOW        |

For each item, we assessed value 1 if the topic was reported in the study and 0 if it was not registered. Each survey's final score was determined by calculating the sum of all valid items divided by their number. Low-, moderate-, or high-quality studies were assessed according to the following evaluation: score < 35% = low quality; 35% ≤ final score < 75% = moderate quality; final score ≥ 75% = high quality. NA: Not Applicable.

**Table S2 – Risk of bias - SURge Checklist**

| Authors                        | Is the design of the study stated in the title and/or abstract? | Is there an explanation of why the research is necessary, placing the study in context of previous work in relevant fields? | Is the purpose or aim of the paper explained? | Is the questionnaire described? | If an existing tool was used, are its psychometric properties presented? If an existing tool was used, are references to the original work provided? | If a new tool was used, are the procedures used to develop and pre-test provided? | If a new tool was used, have its reliability and validity been reported? Is a description of the scoring procedures provided? | Is there a description of the survey population and the sample frame used to identify this population? | Do the authors provide a description of how representative the sample is of the underlying population? | Is a sample size calculation or rationale/justification for the sample size presented? | Mode of administration? | Do the authors provide information on the type of contact and how many attempts were made to contact subjects (i.e., prenotification by letter or telephone, reminder postcard, duplicate questionnaire with reminder)? | Do the authors report whether incentives were provided (financial or other)? | Is there a description of who approached potential participants (e.g., identification of who signed the covering letter)? | Is the method of data analysis described? | Do the authors provide methods for analysis of nonresponse error? | Is the method for calculating response rate provided? | Are definitions provided for complete versus partial completions? | Are the methods for handling item missing data provided? | Is the response rate reported? | Are all respondents accounted for? | Is information given on how nonrespondents differ from respondents? Are the results clearly presented? | Do the results address the objective(s)? | Are the results summarized with reference to the study objectives? Are the strengths of the study stated? | Are the limitations of the study (taking into account potential sources of bias or imprecision) stated? | Is there explicit discussion of the generalizability (external validity) of the results? | Study funding reported? | Research Ethics Board (REB) review reported? Reporting of subject consent procedures? | Total Score | Final Score | Assessment |
|--------------------------------|-----------------------------------------------------------------|-----------------------------------------------------------------------------------------------------------------------------|-----------------------------------------------|---------------------------------|------------------------------------------------------------------------------------------------------------------------------------------------------|-----------------------------------------------------------------------------------|-------------------------------------------------------------------------------------------------------------------------------|--------------------------------------------------------------------------------------------------------|--------------------------------------------------------------------------------------------------------|----------------------------------------------------------------------------------------|-------------------------|-------------------------------------------------------------------------------------------------------------------------------------------------------------------------------------------------------------------------|------------------------------------------------------------------------------|---------------------------------------------------------------------------------------------------------------------------|-------------------------------------------|-------------------------------------------------------------------|-------------------------------------------------------|-------------------------------------------------------------------|----------------------------------------------------------|--------------------------------|------------------------------------|--------------------------------------------------------------------------------------------------------|------------------------------------------|-----------------------------------------------------------------------------------------------------------|---------------------------------------------------------------------------------------------------------|------------------------------------------------------------------------------------------|-------------------------|---------------------------------------------------------------------------------------|-------------|-------------|------------|
| Arqub et al. (2021) [24]       | 1                                                               | 1                                                                                                                           | 1                                             | 1                               | 1                                                                                                                                                    | 0                                                                                 | 0                                                                                                                             | 1                                                                                                      | 0                                                                                                      | 0                                                                                      | 1                       | 0                                                                                                                                                                                                                       | 0                                                                            | 1                                                                                                                         | 1                                         | 0                                                                 | 0                                                     | 0                                                                 | 0                                                        | 1                              | 0                                  | 0                                                                                                      | 1                                        | 1                                                                                                         | 1                                                                                                       | 0                                                                                        | 0                       | 0                                                                                     | 13          | 41%         | MODERATE   |
| Karagözoğlu et al. (2021) [26] | 0                                                               | 0                                                                                                                           | 1                                             | 1                               | 1                                                                                                                                                    | 0                                                                                 | 0                                                                                                                             | 1                                                                                                      | 0                                                                                                      | 0                                                                                      | 1                       | 0                                                                                                                                                                                                                       | 0                                                                            | 0                                                                                                                         | 1                                         | 0                                                                 | 0                                                     | 0                                                                 | 0                                                        | 1                              | 0                                  | 0                                                                                                      | 1                                        | 1                                                                                                         | 0                                                                                                       | 0                                                                                        | 1                       | 1                                                                                     | 11          | 34%         | LOW        |

For each item, we assessed value 1 if the topic was reported in the study and 0 if it was not registered. Each survey's final score was determined by calculating the sum of all valid items divided by their number. Low-, moderate-, or high-quality studies were assessed according to the following evaluation: score < 35% = low quality; 35% ≤ final score < 75% = moderate quality; final score ≥ 75% = high quality. NA: Not Applicable.
